# Supplementary material
Source: Springer Nature journal article supplement (https://www.springermedizin.de/resource/supplementary/13045_2011_176_MOESM1_ESM.pdf/9660816)

## CONSORT diagram

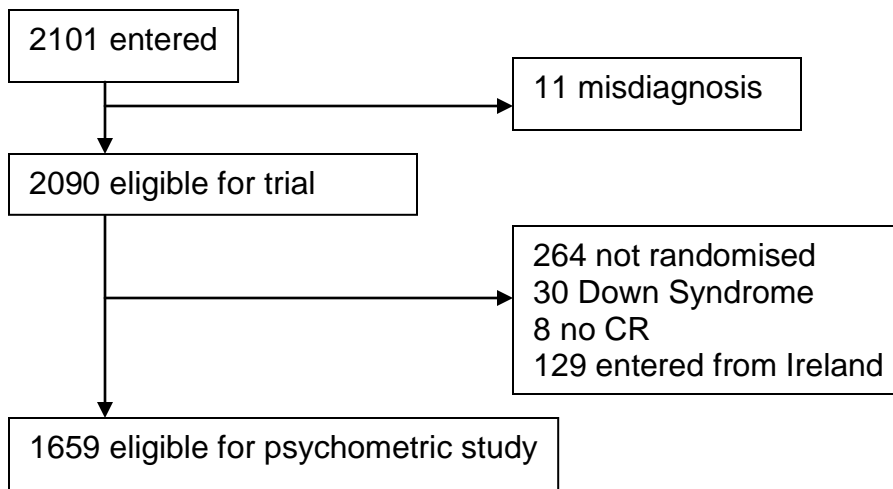

### 5 month test

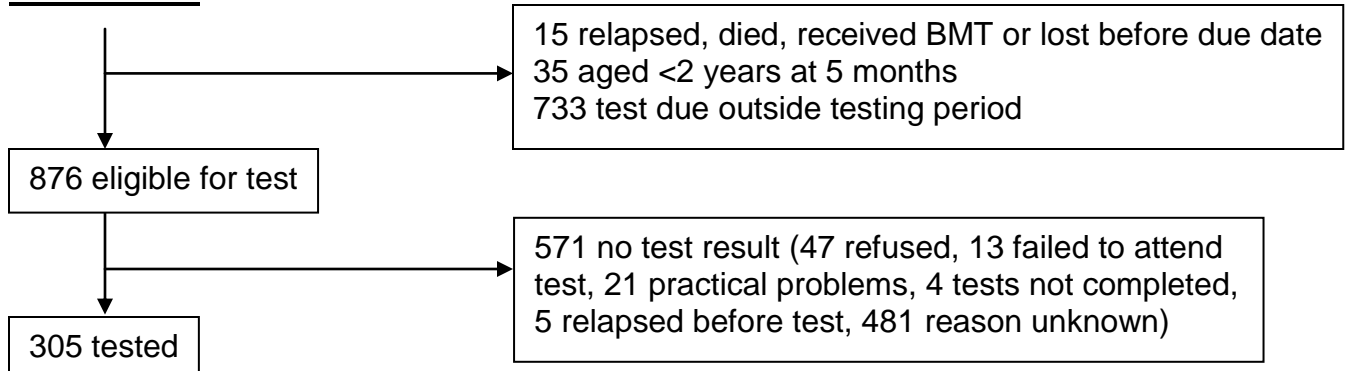

### 3 year test

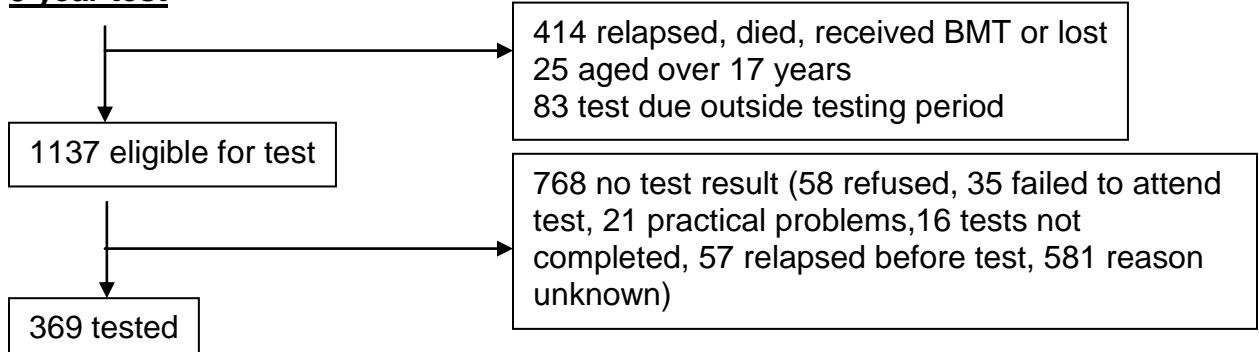

### 5 year test

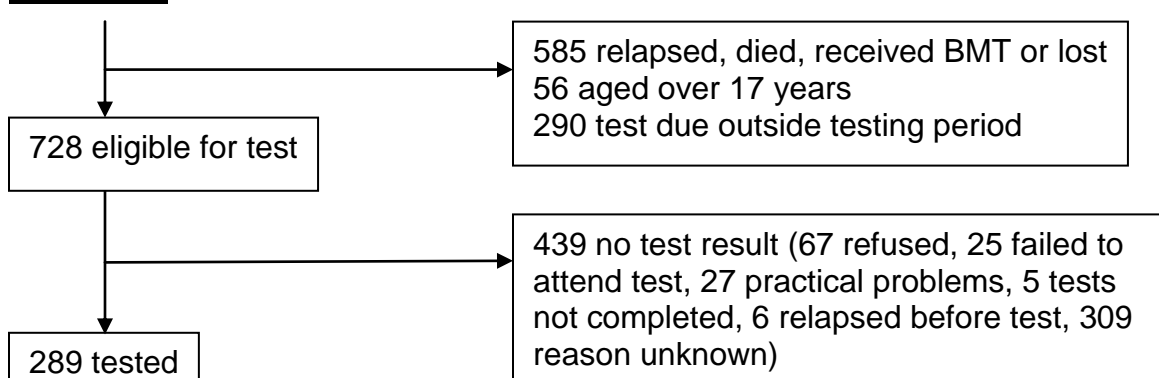

Supplement: MOESM1 [file 9660816]
